# Supplementary material for: Strengths and weaknesses in the diagnostic process of endometriosis from the patients’ perspective: a focus group study
Source: publisher site journal article supplement (doi:10.1515/dx-2021-0043), 2021-07-27
Supplement: Supplementary file 1 [file j_dx-2021-0043_suppl.docx]

**Supplemental Material**

Interview guide

The interview guide is an instrument used by the moderator to guide the discussion in the focus groups. It contains a list of topics selected by the researchers or provided by the participants.

**Interview guide focus groups**

**Participants’ opinion about factors related to the diagnostic delay**

- - When to consult a medical professional
  - Involvement of friends, relatives and significant others
  - Use of over the counter analgesics
  - Effect of medical treatment initiated by general practitioner
  - Knowledge of general practitioner concerning endometriosis
  - Differentiating between normal and abnormal menstrual complaints
  - Physical examination by general practitioner
  - Use of additional diagnostic testing
  - Time between first presentation to general practitioner and referral to secondary care (barriers and facilitators)
  - Referral directly to gynaecologist or other medical specialist
  - Time between referral to gynaecologist and diagnosis (barriers and facilitators)
  - Subfertility
  - Absence from school or work due to menstrual complaints
  - Interaction between patient and medical professional, continuity of care
- **Participants’ opinion about which factors are most important in endometriosis care, for instance (but not restricted to)**
  - Available (online) information about endometriosis
  - Being taken seriously
  - Continuity of medical care (same doctor)
  - Timely start of empiric treatment
  - Information given by medical professional
  - Fast referral
  - Referral to tertiary care (possible pros and cons)
  - Knowledge about endometriosis in general practitioners (both related to the diagnostic procedure and support after diagnosis)
  - Continuation of care by general practitioner after diagnosis and initiation of treatment by gynaecologist
